# Supplementary material
Source: PubMed Central journal article supplement (PMC8284840)
Supplement: NIHMS1709322-supplement-supplement.pdf [file NIHMS1709322-supplement-supplement.pdf]

## Supplementary Appendix

This appendix has been provided by the authors to give readers additional information about their work.

Supplement to: Friedman GK, Johnston JM, Bag AK, et al. Oncolytic HSV-1 G207 immunovirotherapy for pediatric high-grade gliomas. *N Engl J Med* 2021;384:1613-22. DOI: [10.1056/NEJMoa2024947](https://doi.org/10.1056/NEJMoa2024947)

## Supplementary Appendix

### **Oncolytic HSV-1 G207 Immunovirotherapy for Pediatric High-Grade Gliomas**

Gregory K. Friedman, M.D.<sup>1,2,3</sup>; James M. Johnston, M.D.<sup>2,3</sup>; Asim K. Bag, MBBS, M.D.<sup>4</sup>; Joshua D. Bernstock, M.D., Ph.D., M.P.H.<sup>5</sup>; Rong Li, M.D., Ph.D.<sup>2,6</sup>; Inmaculada Aban, Ph.D.<sup>7</sup>; Kara Kachurak, CRNP<sup>1,2</sup>; Li Nan, B.S.<sup>1</sup>; Kyung-Don Kang, Ph.D.<sup>1</sup>; Stacie Totsch, Ph.D.<sup>1</sup>; Charles Schlappi, M.D.<sup>1</sup>; Allison M. Martin, M.D.<sup>8</sup>; Devang Pastakia, M.D.<sup>9</sup>; Rene McNall-Knapp, M.D.<sup>10</sup>; Sameer Farouk Sait, M.D.<sup>11</sup>; Yasmin Khakoo, M.D.<sup>11,12</sup>; Matthias A. Karajannis, M.D., M.S.<sup>11</sup>; Karina Woodling, M.D.; CCRP<sup>13</sup>; Joshua D. Palmer, M.D.<sup>14</sup>; Diana S. Osorio, M.D., M.P.H.<sup>13</sup>; Jeffrey Leonard, M.D.<sup>15</sup>; Mohamed S. Abdelbaki, M.D.<sup>13,16</sup>; Avi Madan-Swain, Ph.D.<sup>1,2</sup>; T. Prescott Atkinson, M.D., Ph.D.<sup>2,17</sup>; Richard J. Whitley, M.D.<sup>2,18</sup>; John B. Fiveash, M.D.<sup>19</sup>; James M. Markert, M.D., M.P.H.<sup>3</sup>; G. Yancey Gillespie, Ph.D.<sup>3</sup>

<sup>1</sup>Department of Pediatrics, Division of Hematology/Oncology, University of Alabama at Birmingham, Birmingham, AL USA

<sup>2</sup>Children's of Alabama, Birmingham, AL, USA

<sup>3</sup>Department of Neurosurgery, University of Alabama at Birmingham, Birmingham, AL USA

<sup>4</sup>Department of Diagnostic Imaging, St. Jude Children's Research Hospital, Memphis, TN USA

<sup>5</sup>Department of Neurosurgery, Brigham and Women's Hospital and Boston Children's Hospital, Harvard Medical School, Boston, MA, USA

<sup>6</sup>Department of Pathology, University of Alabama at Birmingham, Birmingham, AL, USA

<sup>7</sup>Department of Biostatistics, University of Alabama at Birmingham, Birmingham, AL USA

<sup>8</sup>Department of Pediatrics, Albert Einstein College of Medicine, Bronx, NY, USA

<sup>9</sup>Department of Pediatrics, Vanderbilt University Medical Center, Nashville, TN, USA

<sup>10</sup>Department of Pediatrics, The University of Oklahoma Health Sciences Center, Oklahoma City, OK, USA

<sup>11</sup>Department of Pediatrics, Memorial Sloan Kettering Cancer Center, New York, NY, USA

<sup>12</sup>Department of Neurology, Memorial Sloan Kettering Cancer Center, New York, NY, USA

<sup>13</sup>Division of Pediatric Hematology, Oncology and Bone Marrow Transplant, Nationwide Children's Hospital, Columbus, OH, USA

<sup>14</sup>Department of Radiation Oncology, The Ohio State University Comprehensive Cancer Center, Columbus, OH, USA

<sup>15</sup>Department of Pediatric Neurosurgery, Nationwide Children's Hospital, Columbus, OH, USA

<sup>16</sup>Division of Pediatric Hematology, Oncology and Bone Marrow Transplant, Washington University School of Medicine, St Louis, MO, USA

<sup>17</sup>Department of Pediatrics, Division of Pediatric Allergy & Immunology University of Alabama at Birmingham, Birmingham, AL, USA

<sup>18</sup>Department of Pediatrics, Division of Pediatric Infectious Disease, University of Alabama at Birmingham, Birmingham, AL, USA

<sup>19</sup>Department of Radiation Oncology, University of Alabama at Birmingham, Birmingham, AL USA

## SUPPLEMENTARY APPENDIX

### TABLE OF CONTENTS

|                                                                                                                                 |    |
|---------------------------------------------------------------------------------------------------------------------------------|----|
| Table of Contents                                                                                                               | 2  |
| Supplementary Methods                                                                                                           | 3  |
| Figure S1. Response in patient 005 treated with G207                                                                            | 6  |
| Figure S2. Response in patient 007 treated with G207                                                                            | 7  |
| Figure S3. Quantification of T cells, B cells, and plasma cells in matched pre- and post-G207 tissues                           | 8  |
| Figure S4. Immunohistochemistry of CD4+ T cells in matched pre- and post-G207 tissues                                           | 9  |
| Figure S5. CD8+ Immune response in patient 009                                                                                  | 10 |
| Figure S6. CD8+ Neuropathologic response in patient 010                                                                         | 11 |
| Figure S7. H&E and HSV-1/2 stains of tumor after G207                                                                           | 12 |
| Figure S8. Immunohistochemistry of CD20+ B cells in matched pre- and post-G207 tissues                                          | 13 |
| Figure S9. Immunohistochemistry of C138+ plasma cells in matched pre- and post-G207 tissues                                     | 14 |
| Figure S10. Scatterplots of baseline absolute peripheral NK cells as a function of survival time                                | 15 |
| Table S1. Inclusion and exclusion criteria for UAB 1472 (NCT02457845)                                                           | 16 |
| Table S2. Patient demographics, tumor characteristics, and treatment summary                                                    | 18 |
| Table S3. Tumor genetic feature                                                                                                 | 19 |
| Table S4. Performance score, supportive care, subsequent treatments, time to iRANO progression, and overall survival by subject | 20 |
| Table S5. Frequency of adverse events attributable to G207                                                                      | 21 |
| Table S6. Cumulative adverse events by patient receiving G207 alone                                                             | 22 |
| Table S7. Cumulative adverse events by patient receiving G207 + 5 Gy radiation                                                  | 25 |
| Table S8. Cumulative summary of serious adverse events                                                                          | 26 |
| Table S9. Difference in median CD3+, CD4+, CD8+, CD20+, or CD138+ cells in post- compared to pre-treatment tissues              | 27 |
| Table S10. Serologic responses to single dose of intratumoral G207                                                              | 28 |
| Table S11. Peripheral blood counts at baseline and day 7, 14 and 28 after treatment                                             | 29 |
| Supplementary references                                                                                                        | 30 |

## Supplementary Methods

### *HSV G207:*

The  $\gamma_134.5$  gene deletion precludes G207 from evading Protein Kinase R-mediated translational arrest in normal cells; however, G207 is capable of replicating in tumor cells due to altered or mutated signaling pathways that lead to non-functional Protein Kinase R and late viral gene expression.<sup>1</sup> The disruption of viral ribonucleotide reductase provides additional protection and further limits replication in normal cells, whereas proliferating tumor cells often have upregulated ribonucleotide reductase for DNA synthesis that the virus can utilize during replication in tumor cells.<sup>2</sup>

### *Trial Design:*

Each cohort or dose level consisted of 3 participants, and if no dose-limiting toxicities occurred, the study was advanced to the next cohort until the maximum planned dose (cohort 4) was completed. If a dose-limiting toxicity occurred in any participant, 3 additional participants would be enrolled to that cohort. If two dose-limiting toxicities occurred at a dose level, the prior dose level immediately below would be considered the maximum tolerated dose and recommended Phase II dose. Thus, the sample size was up to 24 participants with a minimum of 12 participants needed to complete the maximum planned dose level with no dose-limiting toxicities. While on study, patients were monitored in the outpatient clinic at day 7, 14, 28; and at month 3, 5, 7, 9, 12, 18, 24. HSV-1 serology was performed at screening and outpatient visits starting at day 28. G207 shedding was assessed at baseline, day 1 and 3, and all outpatient visits. Complete blood counts with lymphocyte subsets were obtained at baseline, day 2, and all outpatient visits.

### *Catheter Placement and Virus Infusion:*

Up to four intratumoral catheters (PIC-030, Sophysa) were placed stereotactically and exteriorized. The following day, G207 was infused over 6 hours using infusion tubing (PIT-400, Sophysa) connected to the catheters and microprocessor-controlled infusion pumps. Based on previous Good Laboratory Practices stability testing that showed stable virus activity for up to 8 hours, the 6-hour infusion time was selected to facilitate G207 spread throughout the tumor.

### *Imaging Analysis: Generation of Fraction Tumor Burden (FTB) maps:*

We used a workstation equipped with Horos (Version 3.3.6; <https://horosproject.org/>) and commercially available plug-ins (IB Neuro, IB Rad Tech, IB Delta Suite, Version 2.0; Imaging Biometrics, Elm Grove, Wisconsin), which uses well-validated multistep process to calculate FTB in a semi-automated fashion. The multi-step process, in brief, includes a) generation of delta T1 maps, which are standardized difference

maps computed from the difference of co-registered pre- and postcontrast T1-weighted images; b) quantification of volume of contrast enhancement from the delta T1 map in a semiautomatic fashion and generation of a lesion mask of the enhancing volume; c) registration of the raw data of the perfusion sequence with the post contrast T1 weighted sequence; d) voxel-by-voxel calculation of relative cerebral blood volume (rCBV) and converting it into standardized rCBV; e) transfer of the contrast enhancing lesion mask to the standardized CBV; f) using predefined standardized rCBV thresholds, classification of the contrast enhancing lesion mask as FTB<sub>LOW</sub> if percentage of contrast-enhancing voxels with standardized rCBV of  $\leq 1.0$ , FTB<sub>MID</sub>, if percentage of voxels with standardized rCBV between 1.0 and 1.55; and FTB<sub>HIGH</sub> if percentage of voxels with standardized rCBV of  $\geq 1.55$ ; and g) coding each FTB class in color (FTB<sub>LOW</sub> = blue; FTB<sub>MID</sub> = yellow; FTB<sub>HIGH</sub> = red) and superimpose them on the post contrast T1 weighted sequence. FTB<sub>HIGH</sub> correlates with global histologic tumor content and overall survival.<sup>3-5</sup>

#### *Immunohistochemistry and Quantification:*

Briefly, 4  $\mu\text{m}$  sections were cut from formalin-fixed, paraffin-embedded block preparations. Immunostaining was performed using a fully automated immunostainer (Bond IHC stainer; Leica Biosystems; Buffalo Grove, IL). Clinical immunohistochemistry was performed with ready-to-use antibodies from Leica Biosystems against CD3 (clone: LN10), CD4 (clone: 4B12), CD8 (clone 4B11), CD20 (clone L26); CD138 (clone MI15), and HSV-1/2 (Abcam; monoclonal; clone number 3B6). Appropriate positive and negative control slides were prepared. The negative control slides consisted of tissue sections of each case processed without the addition of primary antibody. An experienced neuropathologist (RL) quantified CD3+, CD4+, CD8+, CD20+, and CD138+ cells in 6 random regions of interest from each matched pre- and post-G207 tissues. Data points were graphed, with a central-line representing the median value, in GraphPad Prism (version 8.4.2, GraphPad Software).

#### *Polymerase Chain Reaction:*

G207 and HSV-1 F strain and the patient's saliva sample were used for preparation of DNA. DNA was purified with the QIAamp Ultrasens Virus (Qiagen, Cat#53704) according to the manufacturer's instruction. DNA was purified using DNeasy columns. Taq PCR Master Mix (Qiagen, Cat# 201443) was used with the following thermal cycler conditions: Initial denaturation for 3 min, 94°C; denaturation for 1 min, 94°C; annealing for 1 min, 56°C; extension for 1 min, 72°C; and final extension for 10 min, 72°C. After PCR, products were mixed with 6x sample solution (Biolabs Cat# B70255) and loaded in 1.5% gel (LE Agarose Cat# BMA5000). DNA ladder (100BP) was used for standard. Pictures of PCR gels were taken. All the primers were purchased from Sigma-Aldrich. The following primers were used: G207-F1: CGT CCC AAC CGC ACA GTC; G207-F2: CAG TCC CAG GTA ACC CTT GT; G207-Rev2: ATA CCG

GGG TTG CCC ATT AAG; LacZ-Fwd1: CAA TTT AAC CGC CAG TCA GG; LacZ- Fwd2: ATG GCG ATT ACC GTT GTT GAT GT; LacZ-Rev1: GGC CTC TTC GCT ATT ACG C; LacZ- Rev2: TGG AAA TCG CTG ATT TGT GT; UAB Primer1: GTC CCG CCG AAC GCA TAC AT; UAB Primer2: CAT ACT TCA GGG CCG ATT GC.

*Statistical Analyses:*

To compare CD3+, CD4+ or CD8+ cells per high-power field in 6 random regions of interest for both matched pre- and post-treatment tissue, a two-tailed unpaired Student's t-test was performed and differences in the median values between post- and pre-treatment samples with 95% confidence intervals were calculated in GraphPad Prism. To assess the potential role of pre-treatment, baseline (Day -2) peripheral blood NK cell numbers on post-G207 survival, Spearman correlation was performed for all subjects (n = 8) and subjects who had died (n = 6). Patients seropositive for HSV-1 at baseline were excluded due to the potential for HSV-1 antibodies limiting G207 infection. Scatterplots of NK cells at baseline as a function of time from G207 treatment were created and the best-fit line was computed.

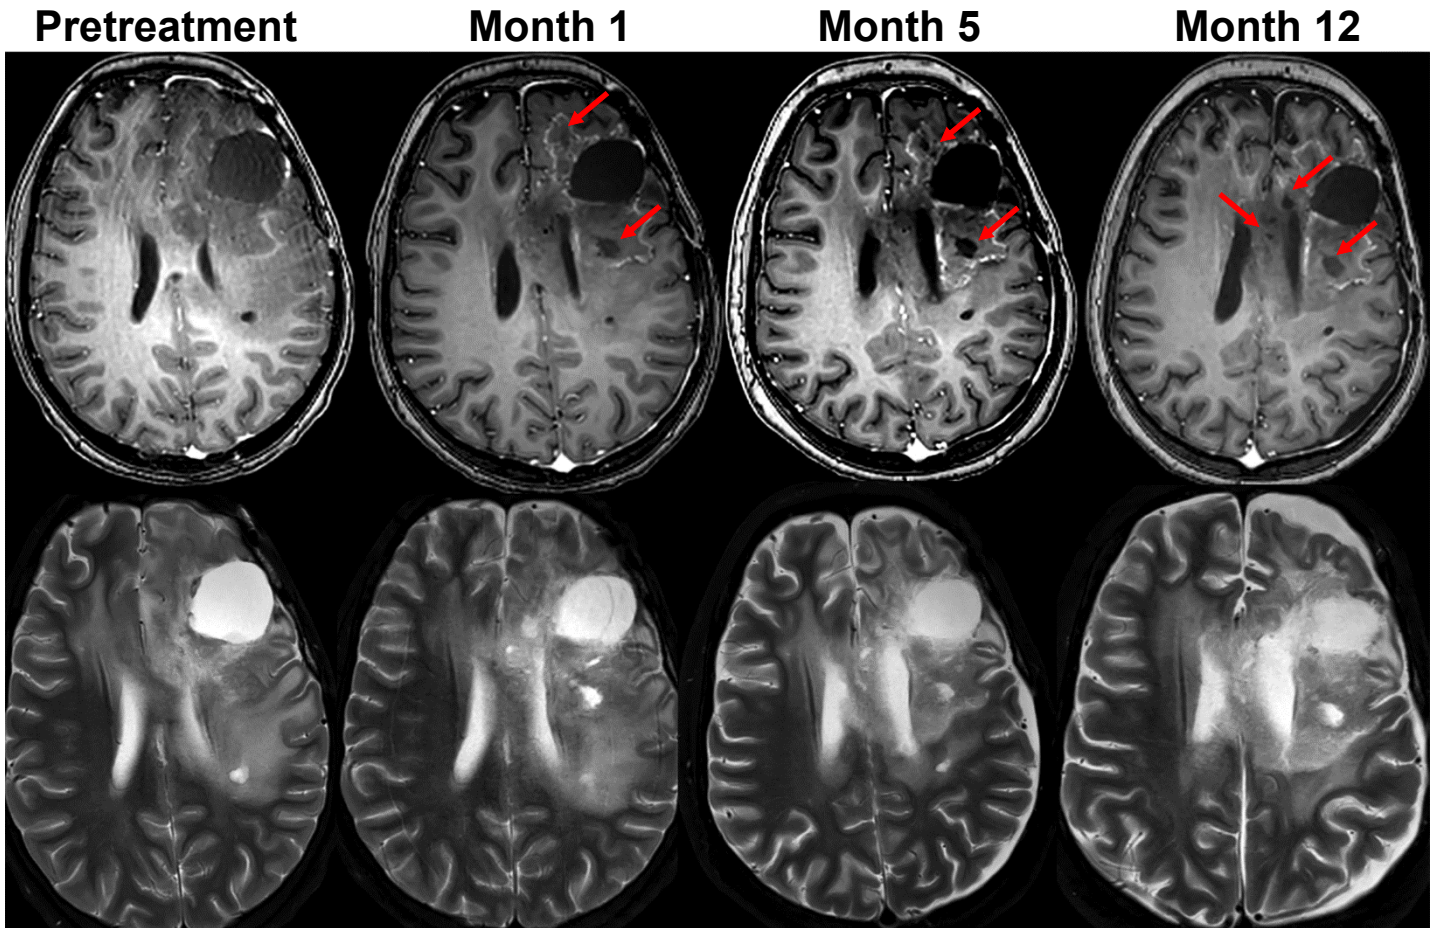

**Figure S1. Response in patient 005 treated with G207.** Top Row: Post-contrast T1-weighted images show stable area of enhancement with formation of multiple cysts (red arrows) where G207 was inoculated. (Bottom Row) Axial T2 sequence shows decreased signal abnormality over time.



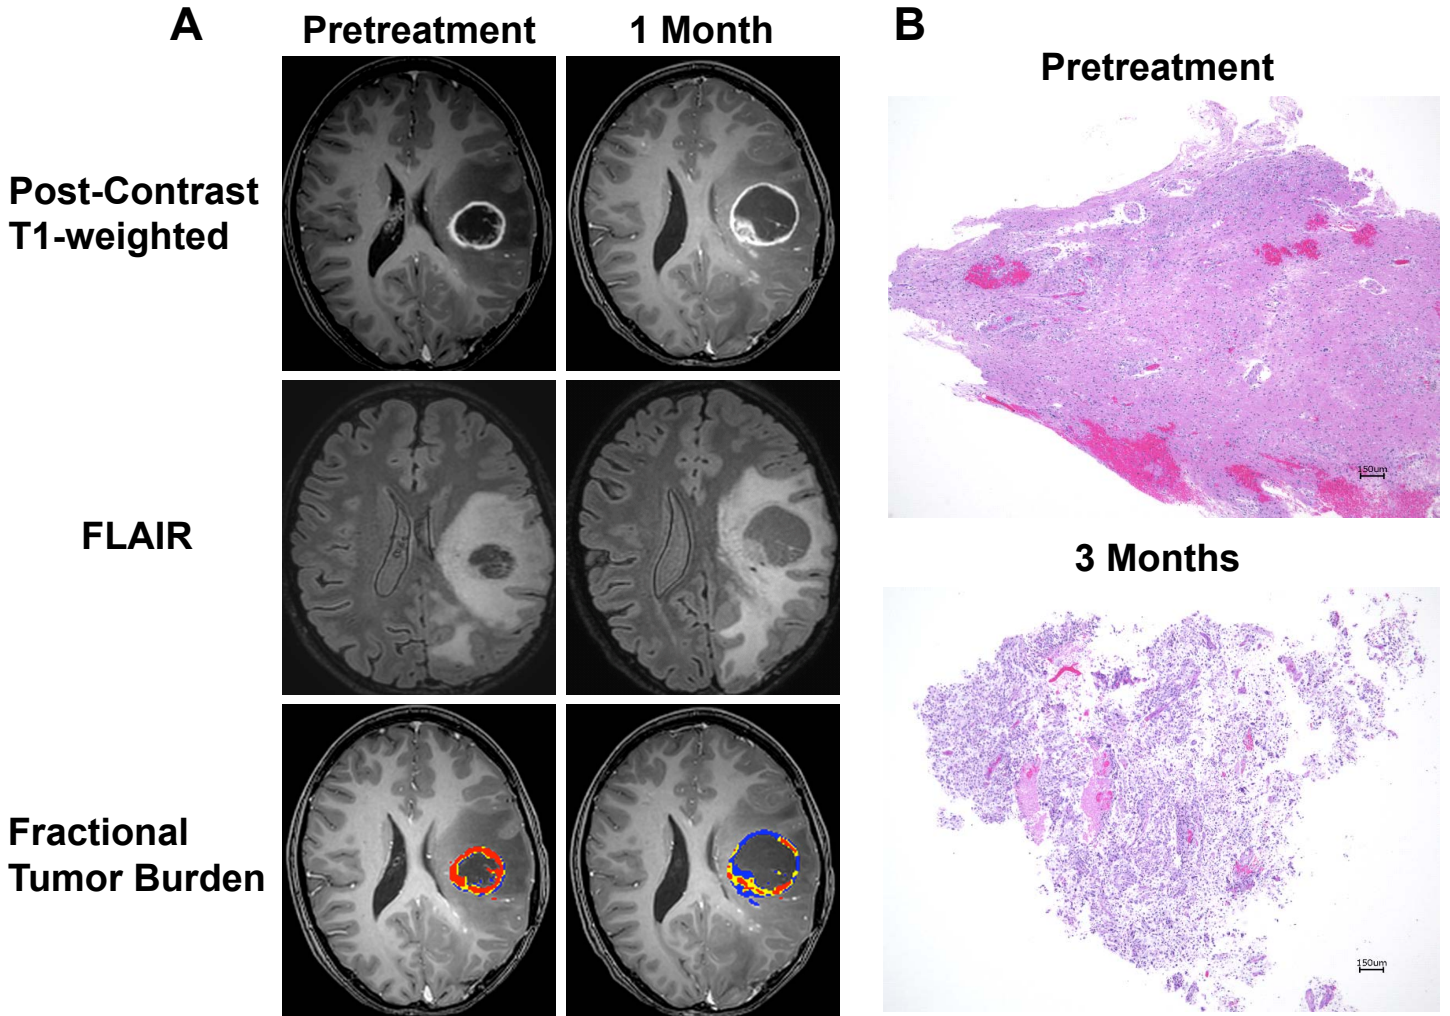

**Figure S2. Response in patient 007 treated with G207.** Panel A shows the comparison of axial images from pretreatment to 1 month post-G207. Post-contrast T1-weighted images show interval enlargement of the enhancing component of the tumor with increase in the central necrotic component and thinning of the enhancing margin. FLAIR images show worsening of the peri-enhancing FLAIR abnormal areas. Fractional Tumor burden (FTB) maps, a parametric perfusion MRI map used to differentiate between tumor (FTB<sub>HIGH</sub>; red color) and treatment effect (blue color), show a decrease of FTB<sub>HIGH</sub> from 63% to 38% from pre- to post-G207 treatment. Panel B shows hematoxylin and eosin stains of pretreatment and 3-month post-G207 biopsy tissue. There were changes in the architecture after G207; the tissue was friable and semi-liquefied. Scale bar = 150  $\mu$ m.



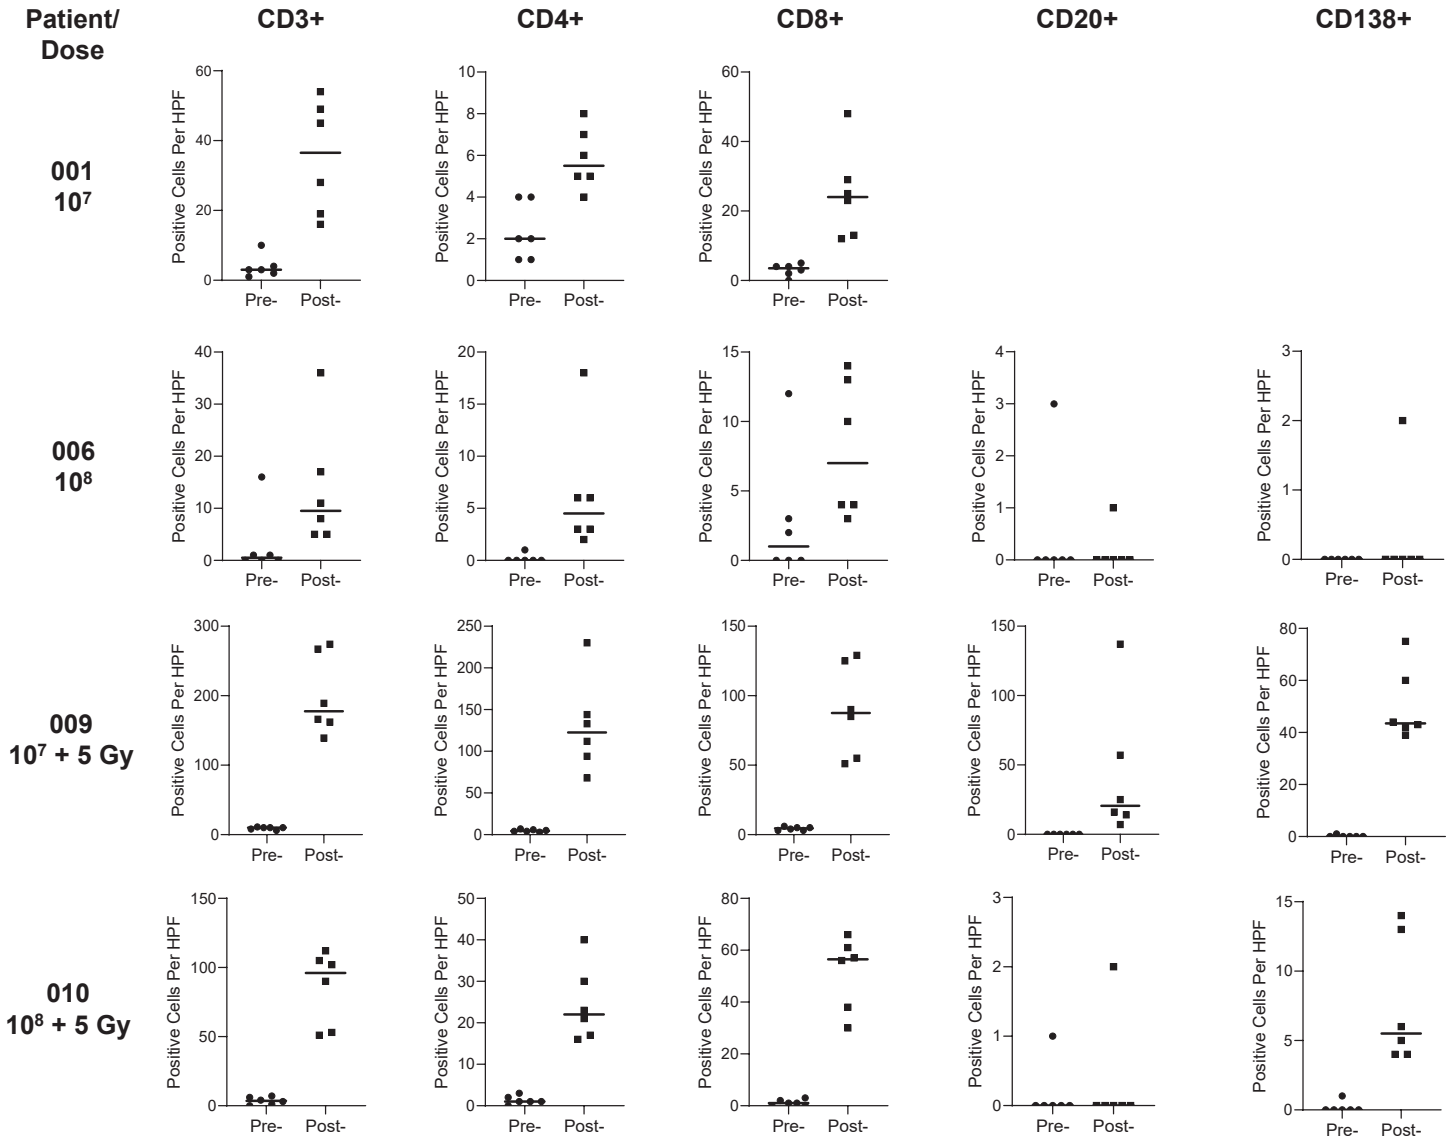

**Figure S3. Quantification of CD3+, CD4+, CD8+ CD20+, and CD138+ per high-power field (HPF) in matched pre- and post-G207 tissues.** Positive cells for CD3, CD4, CD8, CD20 and CD138 were counted by a trained neuropathologist in 6 random HPF (40x) regions of interest in each tissue sample. The data is shown as a scatter plot with the central line representing the median. CD20 and CD138 staining were not performed on patient 001 due to biopsy tissue being exhausted.

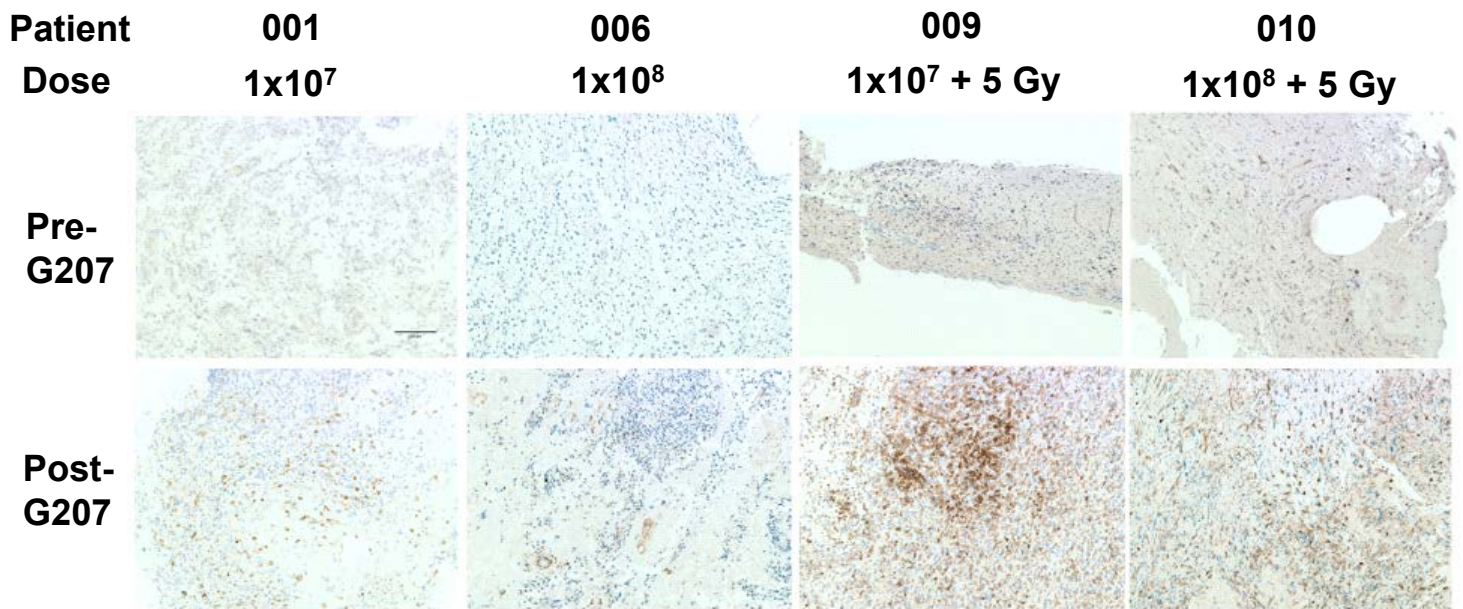

**Figure S4. Immunohistologic staining for CD4+ helper T lymphocytes pre- and post-G207 treatment in 4 patients. (Top row)** The initial core biopsies prior to G207 administration demonstrate few CD4+ cells. **(Bottom row)** Between 3-6 months after G207, tumor tissues from the same 4 subjects revealed a brisk infiltration of CD4+ cells. 10x magnification. Scale bar = 150  $\mu\text{M}$ .

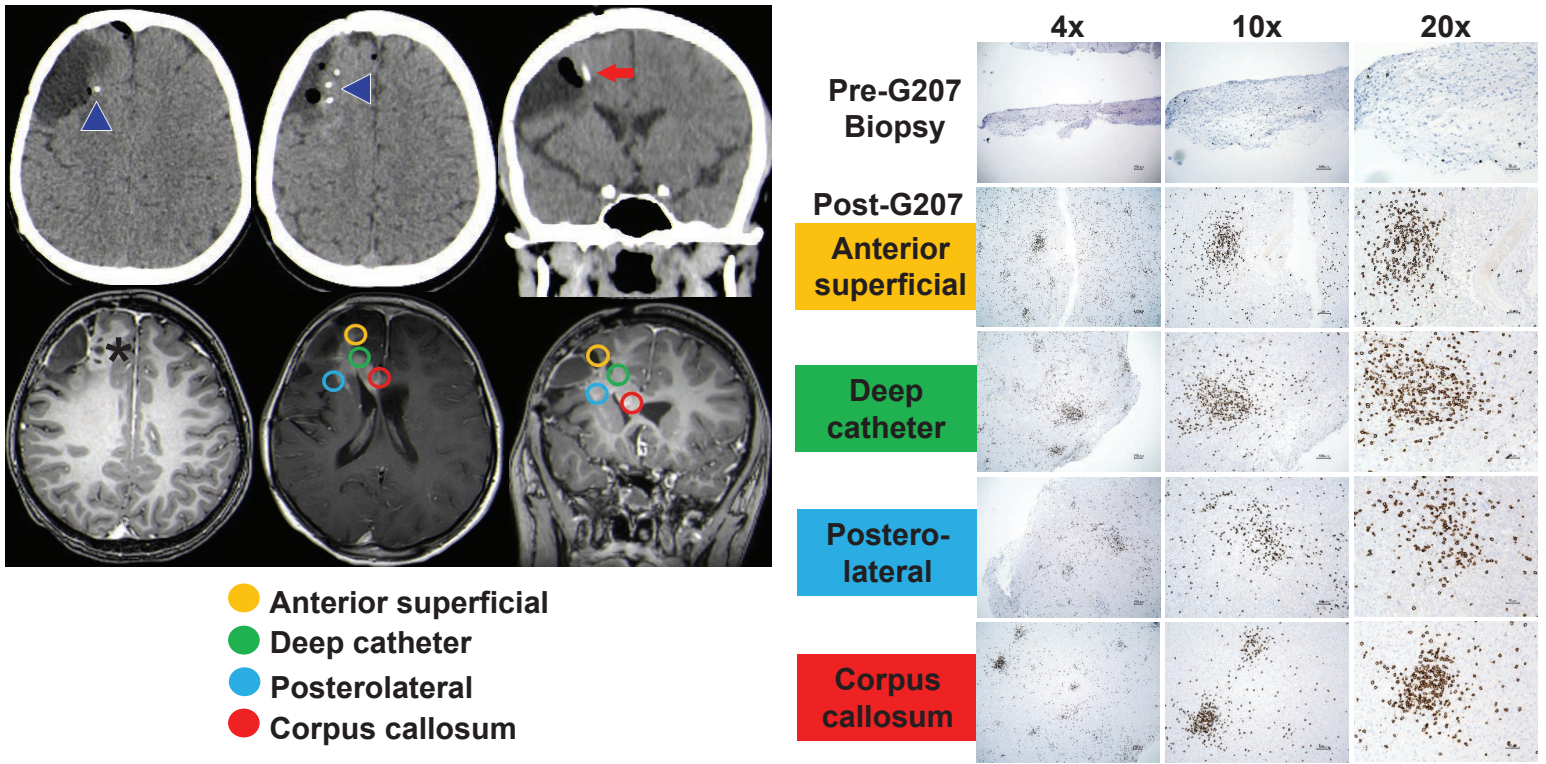

**Figure S5. Immune response throughout tumor in areas adjacent and distant from G207 inoculation in patient 009.** The top row of the left panel shows CT scan, which demonstrates placement of four catheters: 3 superficial (blue arrow heads) and one deep (red arrow). The bottom row of the left panel shows the MRI 5 months after G207 prior to resection. Left image shows cystic changes where G207 was infused (black asterisk). The middle image shows wedge shaped contrast enhancement. Because of uncertainty whether this represented pseudoprogression or progression, tumor resection was performed. Color coded areas in the images indicate regions that were marked during resection for pathological assessment. The right panel shows Immunohistochemistry photomicrographs (4X, 10X and 20X magnification) for CD8+ cytotoxic T cells from tissue obtained from the color coded tissue regions. Large clusters of CD8+ cells were seen in all areas including several centimeters from the initial G207 inoculation site (corpus callosum).



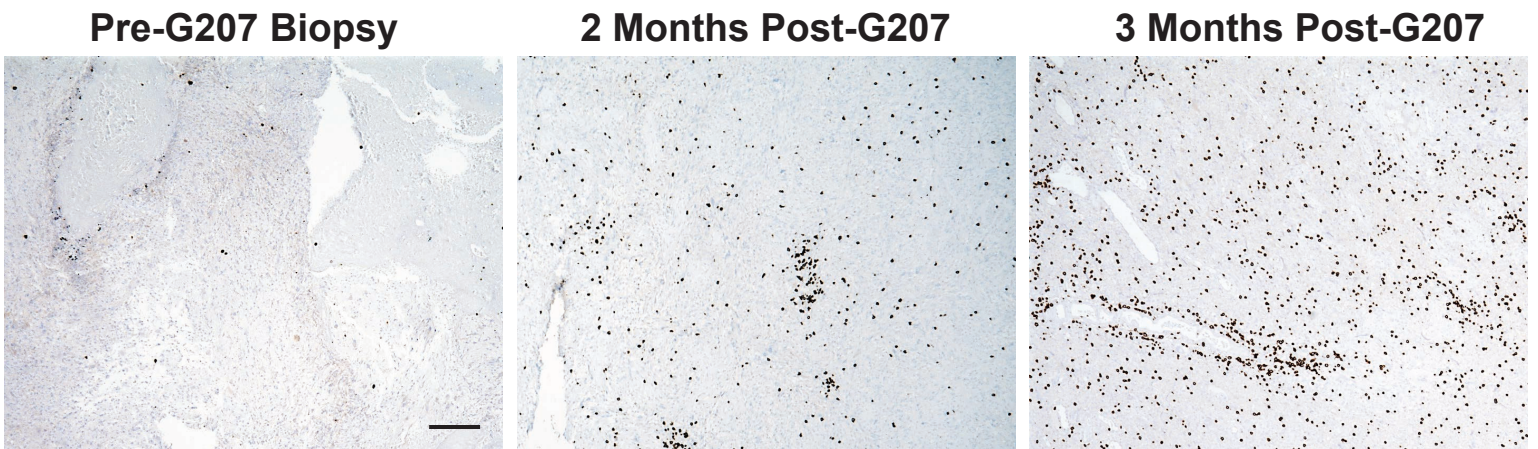

**Figure S6. Neuropathologic response in patient 010 treated with G207 at  $1 \times 10^8$  pfu followed by a single 5 Gy dose of radiation.** Immunohistochemistry for CD8+ T cells was performed on pre-treatment biopsy tissue and on resection tissue at 2 and 3 months post-treatment. Pre-treatment tissue shows few CD8+ T cells consistent with a “cold tumor”. Post-treatment tissue revealed that G207 induces a robust CD8+ T cell response by 2 months that is increased in magnitude at 3 months post-G207 treatment indicating the tumor shifting from immunologically ‘cold’ to ‘hot’. This occurred even in the setting of severe lymphopenia (absolute lymphocyte count of 499) at screening prior to G207. Scale bar = 300  $\mu$ M.

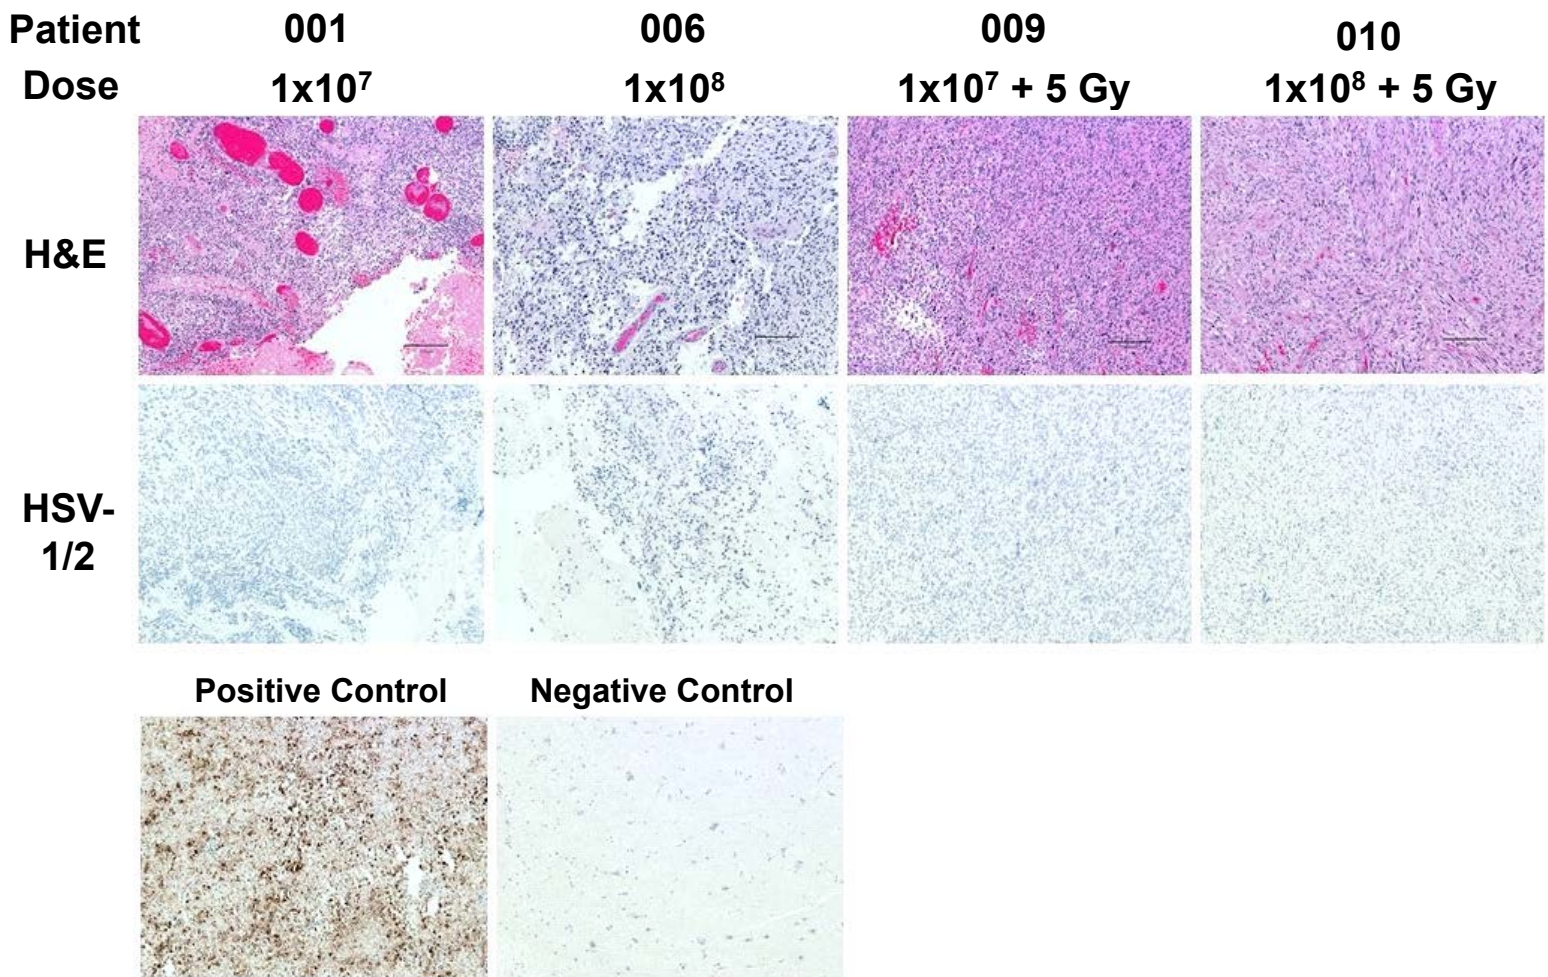

**Figure S7. Hematoxylin and eosin (H&E) and HSV-1/2 stains of tumor tissue 3 months (patient 001 and 010) and 5 months (patient 006 and 009) after G207. All tissues were negative for HSV-1 staining indicating there was not active G207 infection. 10x magnification. Scale bar = 150  $\mu\text{M}$ .**



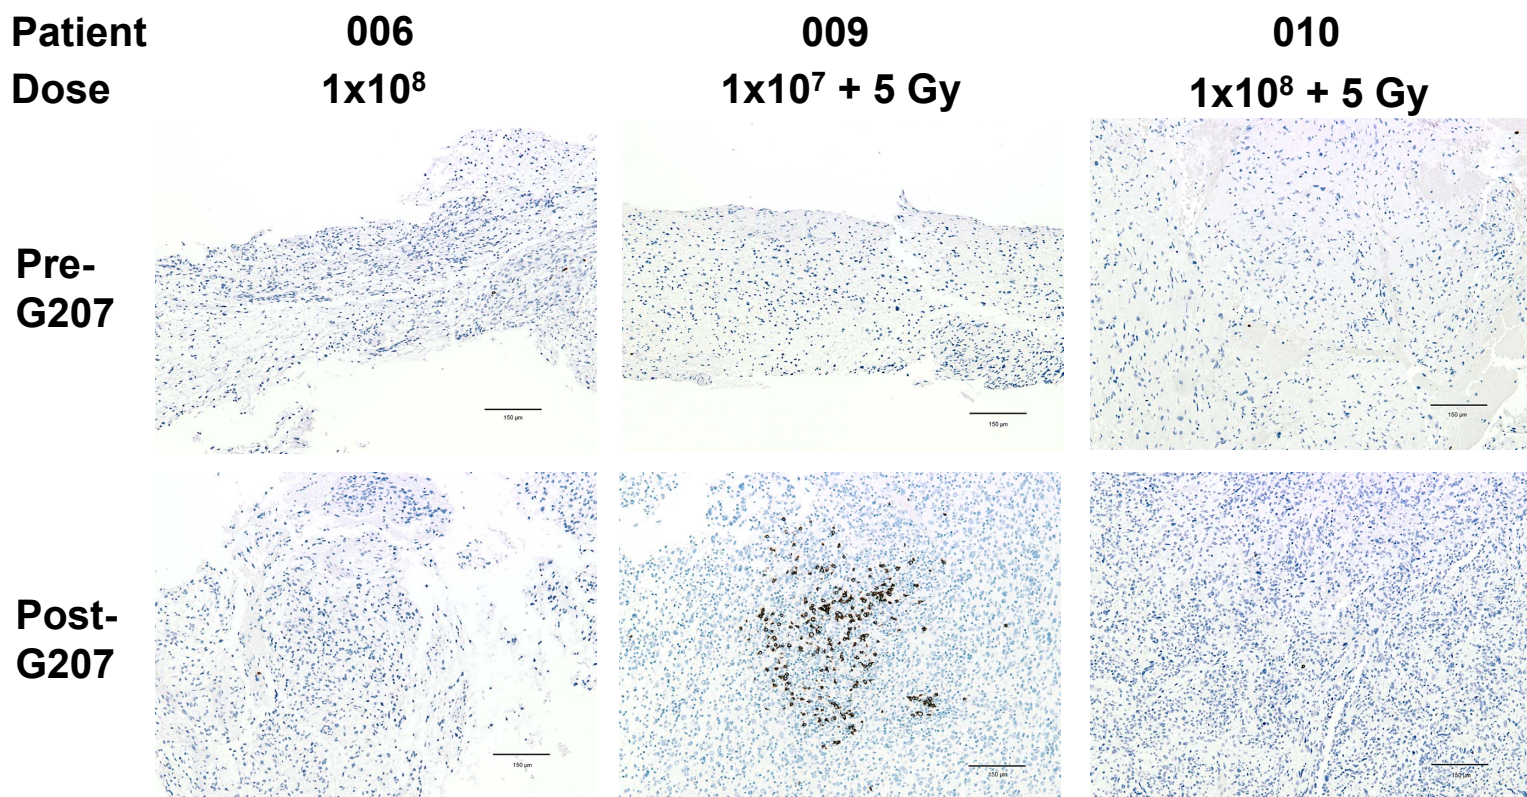

**Figure S8. Immunohistologic staining for CD20+ B lymphocytes pre- and post-G207 treatment in 3 subjects. (Top row)** The initial core biopsies prior to G207 administration demonstrate few CD20+ cells. **(Bottom row)** Infiltration of CD20+ cells was seen in subject 009 5 months after G207 but not in subject 006 or 010 (Between 3-6 months after G207. 10x magnification. Scale bar = 150  $\mu\text{M}$ ).



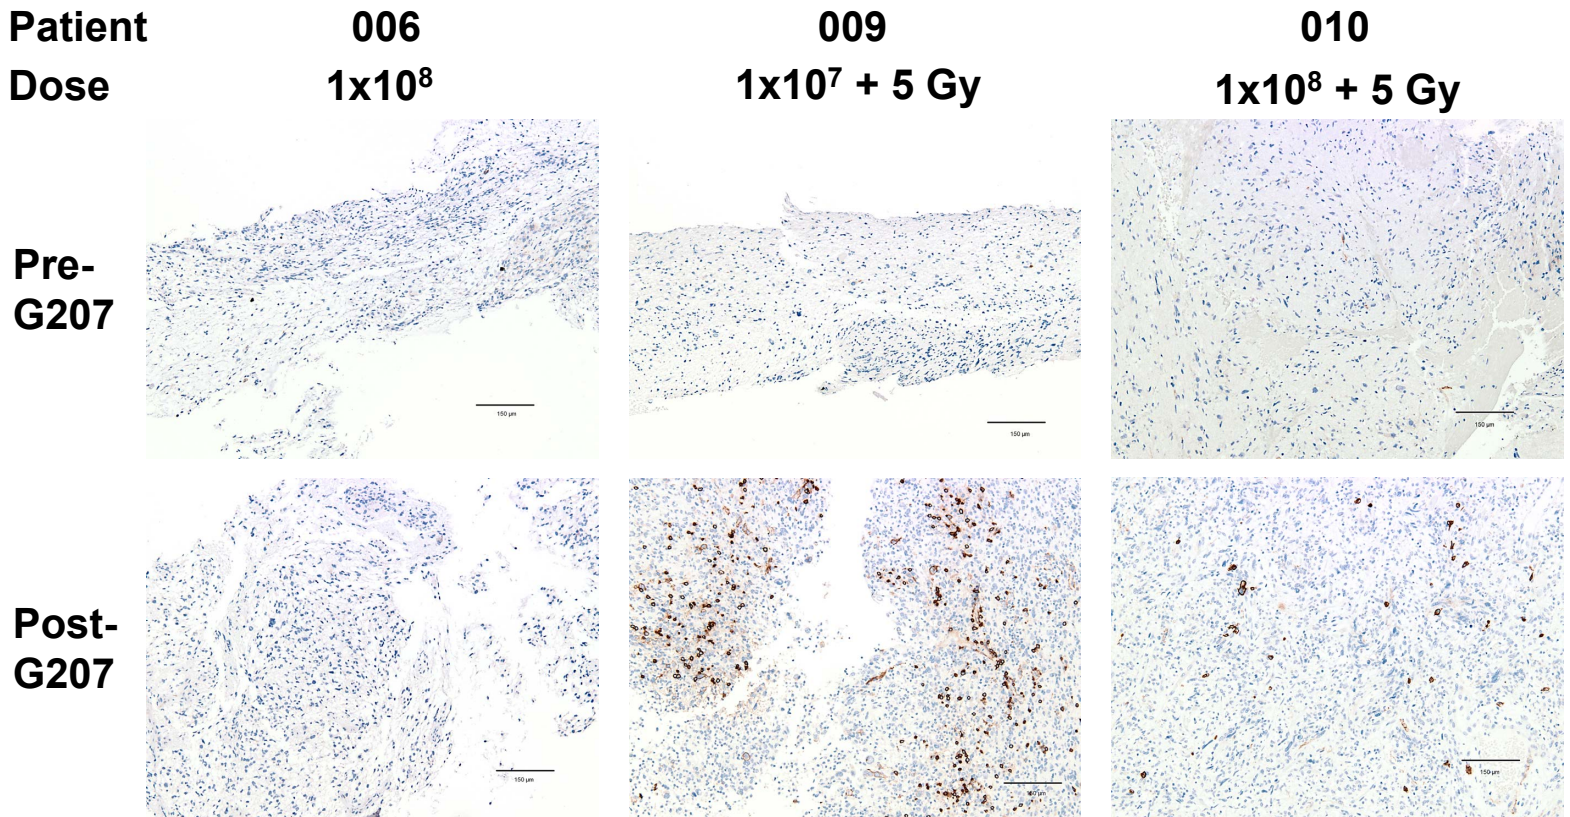

**Figure S9. Immunohistologic staining for CD138+ plasma cells pre- and post-G207 treatment in 3 subjects. (Top row)** The initial core biopsies prior to G207 administration demonstrate few CD138+ cells. **(Bottom row)** Infiltration of CD138+ cells was seen in subject 009 and 010 at 5 and 3 months after G207, respectively, but not in subject 006 6 months after G207. 10x magnification. Scale bar = 150 µM.

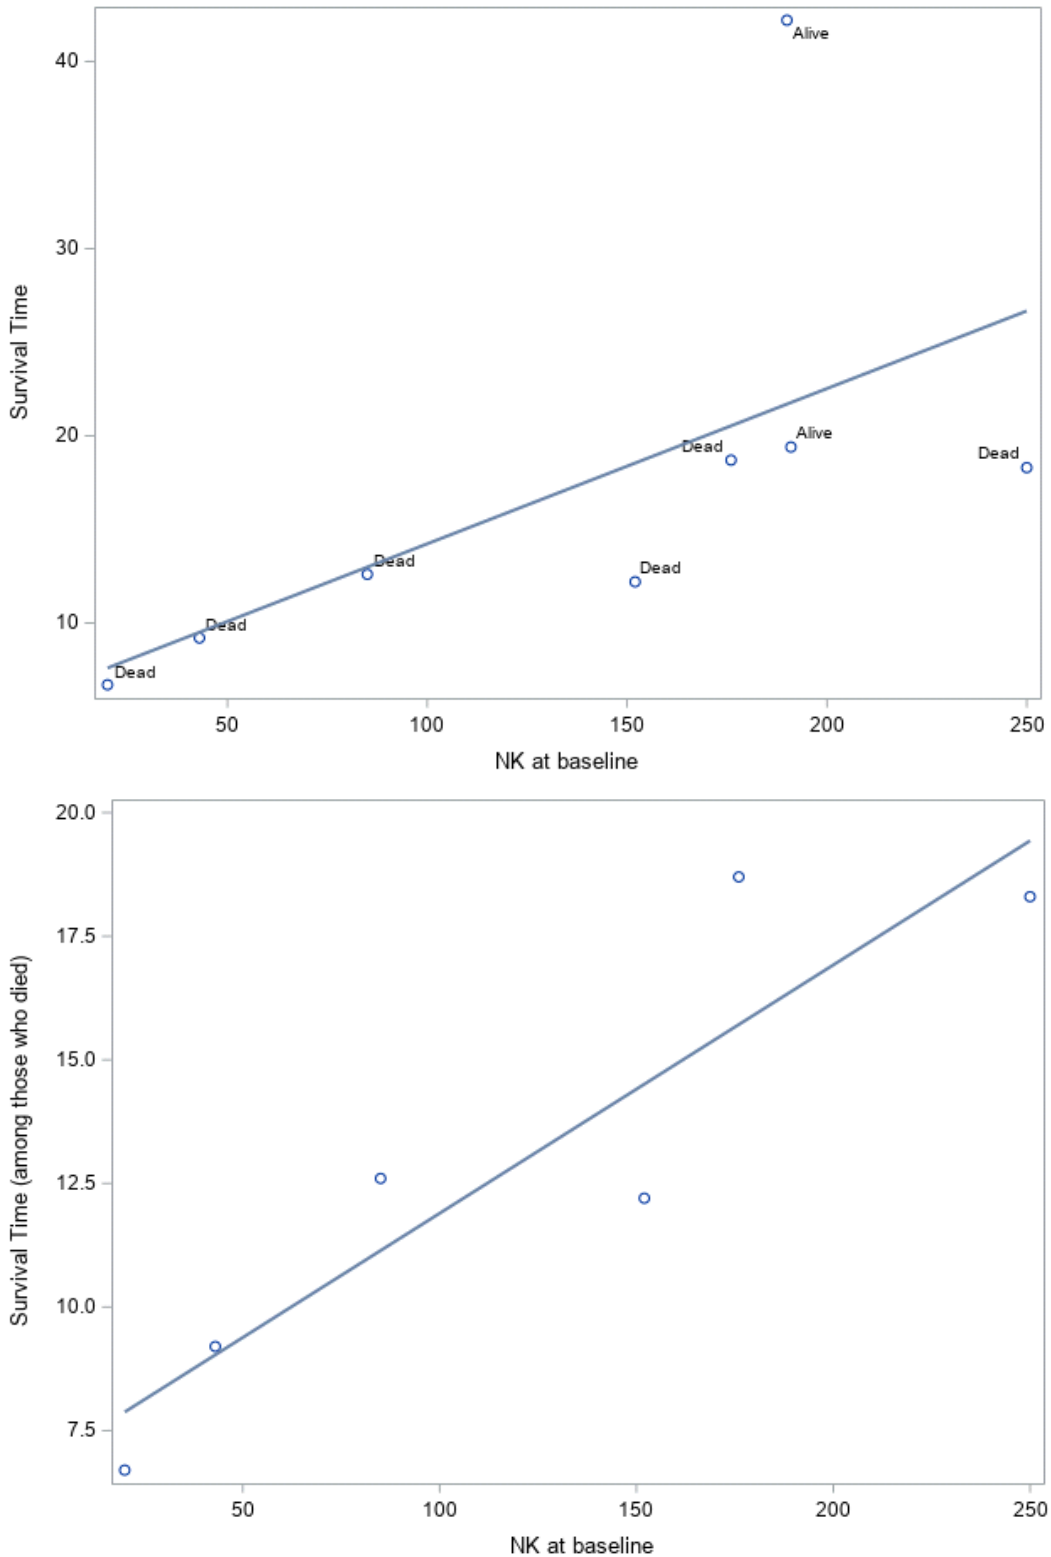

**Figure S10. Scatterplots of peripheral blood absolute NK cells at baseline as a function of survival time in months from G207 treatment.** (Top panel) All subject (n=8). (Bottom panel) Subjects who had died (n=6). Patients seropositive for HSV-1 at baseline were excluded due to the potential for HSV-1 antibodies limiting G207 infection. The best fit line was computed. Spearman R = 0.81 for all subjects and R = 0.88 for subjects who had died.

**Table S1. Inclusion and exclusion criteria for UAB 1472 (NCT02457845)**

| Inclusion Criteria                                                                                                                                                                                                                                                                                                                                                                                                                                                                                                                                                                                                                                                                                                                                                                                                                                                                                                                                                                                                                                                                                                                                                                                                                                                                                                                                                                                                                                                                                                                                                                                                                                                                                                                                                                                                                                                                                                                                                                                                                                                                                                                                                                                                                                                                                                                                                                                                                                                                         | Exclusion Criteria                                                                                                                                                                                                                                                                                                                                                                                                                                                                                                                                                                                                                                                                                                                                                                                                                                                      |
|--------------------------------------------------------------------------------------------------------------------------------------------------------------------------------------------------------------------------------------------------------------------------------------------------------------------------------------------------------------------------------------------------------------------------------------------------------------------------------------------------------------------------------------------------------------------------------------------------------------------------------------------------------------------------------------------------------------------------------------------------------------------------------------------------------------------------------------------------------------------------------------------------------------------------------------------------------------------------------------------------------------------------------------------------------------------------------------------------------------------------------------------------------------------------------------------------------------------------------------------------------------------------------------------------------------------------------------------------------------------------------------------------------------------------------------------------------------------------------------------------------------------------------------------------------------------------------------------------------------------------------------------------------------------------------------------------------------------------------------------------------------------------------------------------------------------------------------------------------------------------------------------------------------------------------------------------------------------------------------------------------------------------------------------------------------------------------------------------------------------------------------------------------------------------------------------------------------------------------------------------------------------------------------------------------------------------------------------------------------------------------------------------------------------------------------------------------------------------------------------|-------------------------------------------------------------------------------------------------------------------------------------------------------------------------------------------------------------------------------------------------------------------------------------------------------------------------------------------------------------------------------------------------------------------------------------------------------------------------------------------------------------------------------------------------------------------------------------------------------------------------------------------------------------------------------------------------------------------------------------------------------------------------------------------------------------------------------------------------------------------------|
| <ul style="list-style-type: none"> <li>• Age <math>\geq</math> 36 months and <math>&lt;</math> 19 years</li> <li>• Pathologically proven malignant supratentorial brain tumor (including glioblastoma multiforme, giant cell glioblastoma, anaplastic astrocytoma, primitive neuroectodermal tumor, ependymoma, atypical teratoid/rhabdoid tumor, germ cell tumor, or other high-grade malignant tumor) which is progressive or recurrent despite standard care including surgery, radiotherapy, and/or chemotherapy. A pathologically proven secondary malignant tumor without curative treatment options is eligible</li> <li>• Lesion must be <math>\geq</math> 1.0 cm in diameter and surgically accessible as determined by MRI</li> <li>• Patients must have fully recovered from acute treatment related toxicities of all prior chemotherapy, immunotherapy or radiotherapy prior to entering this study.</li> <li>• Myelosuppressive chemotherapy: patients must have received their last dose at least 3 weeks prior (or at least 6 weeks if nitrosourea)</li> <li>• Investigational/Biologic agents: patients must have recovered from any acute toxicities potentially related to the agent and received last dose <math>\geq</math> 7 days prior to entering this study (this period must be extended beyond the time during which adverse events are known to occur for agents with known adverse events <math>\geq</math> 7 days). For viral therapy, patients must have received viral therapy <math>\geq</math> 3 months prior to study entry and have recovered from all acute toxicities potentially related to the agent</li> <li>• Monoclonal antibodies: patient must have received last dose <math>\geq</math> 21 days prior.</li> <li>• Radiation: Patients must have received their last fraction of craniospinal radiation (<math>&gt;</math> 24 Gy) or total body irradiation <math>\geq</math> 3 months prior to study entry. Patients must have received focal radiation to symptomatic metastatic sites or local palliative radiation <math>\geq</math> 28 days prior to study entry.</li> <li>• Autologous bone marrow transplant: Patients must be <math>\geq</math> 3 months since transplant prior to study entry.</li> <li>• Normal hematological, renal and liver function (Absolute neutrophil count <math>&gt;</math> 1000/mm<sup>3</sup>, Platelets <math>&gt;</math> 100,000/mm<sup>3</sup>, PT or PTT <math>&lt;</math> 1.3 x control,</li> </ul> | <ul style="list-style-type: none"> <li>• Any treatment outside the allowable guidelines in the inclusion criteria</li> <li>• Acute infection, granulocytopenia or medical condition precluding surgery</li> <li>• Pregnant or lactating females</li> <li>• Prior history of encephalitis, multiple sclerosis, or other CNS infection</li> <li>• Tumor involvement which would require ventricular, cerebellar or brainstem inoculation or would require access through a ventricle in order to deliver treatment</li> <li>• Required steroid increase within 1 week prior to injection</li> <li>• Known HIV seropositivity</li> <li>• Concurrent therapy with any drug active against HSV (acyclovir, valacyclovir, penciclovir, famciclovir, ganciclovir, foscarnet, cidofovir) or any immunosuppressive drug therapy (except dexamethasone or prednisone).</li> </ul> |

Creatinine within normal institutional limits OR creatinine clearance  $>60$  mL/min/1.73 m<sup>2</sup> for patients with creatinine levels above institutional normal, Total Bilirubin  $< 1.5$  mg/dl, Transaminases  $< 3$  times above the upper limits of the institutional norm)

- Patients  $< 16$  years, Modified Lansky score  $\geq 60$ ; patients  $\geq 16$  years, Karnofsky score  $\geq 60$
- Patient life expectancy must be at least 8 weeks
- Written informed consent in accordance with institutional and FDA guidelines must be obtained from patient or legal guardian

**Table S2. Patient demographics, tumor characteristics, and treatment summary**

| Subject ID | Age/<br>Gender | Diagnosis/<br>Tumor Location                                                                               | Tumor<br>Size (mm)                             | Prior Failed Therapies                                                                                                                                                    | Catheters<br>Infused | Dose<br>(pfu)           |
|------------|----------------|------------------------------------------------------------------------------------------------------------|------------------------------------------------|---------------------------------------------------------------------------------------------------------------------------------------------------------------------------|----------------------|-------------------------|
| 001        | 12<br>Female   | Glioblastoma<br>Right parietal; occipital                                                                  | 35 x 32                                        | (1) Surgery/radiation/temozolomide<br>(2) Vemurafenib<br>(3) Lomustine/bevacizumab                                                                                        | 3                    | 10 <sup>7</sup>         |
| 002        | 17<br>Male     | Anaplastic astrocytoma<br>Left frontal; insular                                                            | 51 x 19                                        | (1) Surgery/radiation/temozolomide<br>(2) Surgery                                                                                                                         | 3                    | 10 <sup>7</sup>         |
| 003        | 14<br>Female   | Glioblastoma<br>Left fronto-temporal; insular                                                              | 43 x 30<br>10 x 19<br>(satellite)              | (1) Surgery/radiation/temozolomide/valproic acid<br>(2) Surgery/ re-irradiation<br>(3) Lomustine/procarbazine                                                             | 4                    | 10 <sup>7</sup>         |
| 004        | 13<br>Male     | Glioblastoma<br>Left mesial occipital;<br>posterior temporal                                               | 39 x 37                                        | (1) Surgery/radiation<br>(2) Surgery/vincristine/etoposide/<br>cisplatin/cyclophosphamide<br>(3) Irinotecan/temozolomide/bevacizumab<br>(4) Etoposide/sirolimus/celecoxib | 4                    | 10 <sup>8</sup>         |
| 005        | 12<br>Male     | Glioblastoma<br>Left frontal                                                                               | 67 x 57                                        | (1) Surgery/radiation/temozolomide<br>(2) Nivolumab/bevacizumab                                                                                                           | 4                    | 10 <sup>8</sup>         |
| 006        | 10<br>Male     | Glioblastoma<br>Right temporal; thalamus                                                                   | 24 x 38                                        | (1) Surgery/radiation/cisplatin/<br>cyclophosphamide/lomustine/vincristine                                                                                                | 4                    | 10 <sup>8</sup>         |
| 007        | 16<br>Female   | Glioblastoma<br>Left parietal; frontal                                                                     | 33 x 25<br>12 x 8<br>(satellite)               | (1) Surgery/radiation/temozolomide                                                                                                                                        | 3                    | 10 <sup>7</sup><br>5 Gy |
| 008        | 7<br>Female    | Glioblastoma<br>Left frontal; corpus callosum                                                              | 49 x 22                                        | (1) Surgery/radiation/temozolomide/lomustine<br>(2) Surgery/lenvatinib/everolimus<br>(3) Surgery                                                                          | 4                    | 10 <sup>7</sup><br>5 Gy |
| 009        | 10<br>Female   | Glioblastoma<br>Right frontal                                                                              | 24 x 12                                        | (1) Surgery/radiation/temozolomide/lomustine                                                                                                                              | 3                    | 10 <sup>7</sup><br>5 Gy |
| 010        | 18<br>Female   | Glioblastoma<br>Left temporal                                                                              | 30 x 16<br>18 x 9<br>(satellite)               | (1) Surgery/radiation/temozolomide/lomustine                                                                                                                              | 4                    | 10 <sup>8</sup><br>5 Gy |
| 011        | 17<br>Male     | Glioblastoma<br>Right frontal                                                                              | 34 x 15<br>(Anterior)<br>26 x 8<br>(Posterior) | (1) Surgery/radiation/veliparib/temozolomide<br>(2) Re-irradiation/temozolomide                                                                                           | 4                    | 10 <sup>8</sup><br>5 Gy |
| 012        | 15<br>Male     | High-grade glioma, not-<br>otherwise specified<br>Right frontal; Sylvian fissure<br>leptomeningeal disease | 33 x 22                                        | (1) Surgery<br>(2) Surgery/radiation/temozolomide/lomustine                                                                                                               | 3                    | 10 <sup>8</sup><br>5 Gy |

**Table S3. Tumor genetic features**

| Subject ID | Comprehensive Genomic Profiling*                         | Timing of Report       | Genetic Features                                                                                                                                                                                                                  |
|------------|----------------------------------------------------------|------------------------|-----------------------------------------------------------------------------------------------------------------------------------------------------------------------------------------------------------------------------------|
| 001        | No                                                       | Diagnosis              | <i>ATRX</i> loss; <i>BRAF V600E</i> mutation; <i>IDH</i> wild-type; MGMT unmethylated                                                                                                                                             |
| 002        | No                                                       | Diagnosis              | <i>IDH</i> wild-type; <i>BRAF V600E</i> negative; <i>ATRX</i> wild-type                                                                                                                                                           |
| 003        | No                                                       | First recurrence       | <i>IDH</i> wild-type; <i>H3K27M</i> negative                                                                                                                                                                                      |
| 004        | FoundationOne®                                           | Diagnosis              | <i>MLL</i> R2204Q; <i>RBI</i> Q597fs*4; <i>TP53</i> R175H                                                                                                                                                                         |
| 005        | FoundationOne®                                           | Diagnosis              | <i>KDR</i> , <i>KIT</i> , <i>PDGFRA</i> amplification; <i>CDKN2A/B</i> loss                                                                                                                                                       |
|            | MSK-IMPACT Solid Tumor Testing                           | Diagnosis              | Same as above and <i>TEK</i> loss, <i>STAG2</i> splicing mutation, <i>RHOA</i> missense mutation; <i>PDGFRA</i> rearrangement results in exon 10 deletion<br>MGMT unmethylated                                                    |
| 006        | FoundationOne®                                           | Diagnosis              | <i>PTEN</i> M1fs*1; <i>CDKN2A/B</i> loss; <i>PTPN11</i> G60A; <i>KMT2C (MLL3)</i> deletion exons 54-55; microsatellite status stable; tumor mutation burden low (1 per megabase); MGMT unmethylated                               |
| 007        | FoundationOne®                                           | Diagnosis              | No reportable genomic alterations; MGMT unmethylated                                                                                                                                                                              |
| 008        | MD Anderson Cancer Center Solid Tumor Genomic Assay 2018 | Recurrence (pre-G207)  | <i>CDK4</i> mutation; <i>MDM2</i> mutation; MGMT unmethylated                                                                                                                                                                     |
| 009        | FoundationOne®                                           | Diagnosis              | <i>RAF1</i> GPHN- <i>RAF1</i> rearrangement; <i>ATRX</i> C235fs*22; <i>CDKN2A/B</i> loss; <i>TP53</i> R282W                                                                                                                       |
|            |                                                          | Recurrence (post-G207) | <i>RAF1</i> GPHN- <i>RAF1</i> fusion; <i>ATRX</i> C235fs*22; <i>MTAP</i> loss exons 2-8; <i>TP53</i> R282W; microsatellite status stable; tumor mutational burden low (4 per megabase)                                            |
| 010        | FoundationOne®                                           | Diagnosis              | <i>NF1</i> R2583fs*13; <i>ATRX</i> splice site 6326+1G>A; <i>CDKN2A/B</i> loss; <i>MTAP</i> loss exons 2-8; <i>TP53</i> R110L; microsatellite status stable; tumor mutation burden low (0 per megabase); MGMT unmethylated        |
| 011        | FoundationOne®                                           | Diagnosis              | <i>ATRX</i> K183*; <i>BCL6</i> R459H; <i>TP53</i> H179Y, H214fs*4; <i>CDKN2A</i> p16INK4A R80*; <i>CDKN2A</i> p14ARF P94L; <i>H3F3A</i> G35R subclonal microsatellite status stable; tumor mutational burden low (3 per megabase) |
|            | MSK-IMPACT Solid Tumor Testing                           | Diagnosis              | Same as above and <i>NOTCH1</i> F357del, <i>PDGFRA</i> G286E; tumor mutational burden 6.1 per megabase                                                                                                                            |
| 012        | FoundationOne®                                           | First recurrence       | <i>BCOR</i> rearrangement intron 1; <i>EP300</i> truncation exon 31                                                                                                                                                               |

\*FoundationOne® assay interrogated 315-324 genes as well as introns of 28-36 genes involved in rearrangements  
MSK-IMPACT (Integrated Mutation Profiling of Actionable Cancer Targets) identifies specific mutations in 468 genes  
MD Anderson Cancer Center Solid Tumor Genomic Assay 2018 is a next generation sequencing-based analysis for detection of somatic mutations in the coding sequence of 134 genes and selected copy number variations (amplifications) in 47 genes (overlap: 146 genes total)



**Table S4. Performance score, supportive care, subsequent treatments, time at which iRANO progression criteria was met, overall survival by subject**

| Subject ID | Dose Level | Performance Score at Screening | Steroids Post-G207 Dose (~Month Started)        | Bevacizumab Post-G207 Dose (~Month Started) | Therapy Post-G207 (~Month Started)                                                                                                | iRANO Progression Criteria Met (months) | Overall Survival (months) |
|------------|------------|--------------------------------|-------------------------------------------------|---------------------------------------------|-----------------------------------------------------------------------------------------------------------------------------------|-----------------------------------------|---------------------------|
| 001        | 1          | 80                             | Prednisone 30mg twice daily (0.5 months)        | None                                        | Partial resection (3 months)<br>Palliative radiation (4 months)                                                                   | 1.2                                     | 8.7                       |
| 002        | 1          | 80                             | None                                            | None                                        | None                                                                                                                              | —                                       | 42.2; alive               |
| 003        | 1          | 80                             | Dexamethasone 1mg daily-4mg 4x/day (3 months)   | 5mg/kg (3 months)                           | None                                                                                                                              | 4.6                                     | 6.7                       |
| 004        | 2          | 90                             | None                                            | None                                        | Partial resection (2 months)<br>Palliative radiation (3 months)                                                                   | 1.2                                     | 12.2                      |
| 005        | 2          | 70                             | Dexamethasone 0.5mg daily-2mg 3x/day (2 months) | 5-10mg/kg (2 months)                        | SurVaxM (15 months)                                                                                                               | 14.3                                    | 18.3                      |
| 006        | 2          | 100                            | None                                            | 5mg/kg (2 months)                           | Palliative radiation, TMZ (7 months)<br>IT methotrexate x 3 doses (12 months)<br>Ramucirumab (16 months)                          | 5.9                                     | 18.7                      |
| 007        | 3          | 90                             | None                                            | 5-10mg/kg (1 month)                         | Palliative radiation (3.5 months)<br>Lomustine (5 months)<br>Indoximod, TMZ (7 months)                                            | 2.8                                     | 9.2                       |
| 008        | 3          | 100                            | None                                            | 5mg/kg (1 month)                            | Indoximod, TMZ (4 months)<br>Palliative radiation (4 months)                                                                      | 3.0                                     | 5.1                       |
| 009        | 3          | 100                            | None                                            | 5-10mg/kg *(9 months)                       | Partial resection (5 months)<br>Pembrolizumab x 10 doses (5 months)<br>Palliative radiation (6 months)<br>Trametinib (13 months)  | 4.8                                     | 19.4; alive               |
| 010        | 4          | 100                            | None                                            | None                                        | Partial resection (2 & 3 months)<br>Palliative radiation (4 months)<br>Pembrolizumab x 1 dose (5 months)<br>Everolimus (9 months) | 2.8                                     | 12.6                      |
| 011        | 4          | 80                             | None                                            | None                                        | None                                                                                                                              | 2.3                                     | 3.8                       |
| 012        | 4          | 100                            | None                                            | None                                        | None                                                                                                                              | —                                       | 1.7; alive                |

\*Patient 009 received bevacizumab as supportive care 9 months post-G207 when no longer on study and after initiating other therapies —, patient did not progress; TMZ, temozolomide

**Table S5: Frequency of adverse events attributable to G207**

| <b>Event</b>               | <b>Body System</b>   | <b>Grade 1</b> | <b>Grade 2</b> | <b>Grade 3</b> | <b>Grade 4</b> | <b>Total</b> |
|----------------------------|----------------------|----------------|----------------|----------------|----------------|--------------|
| Diarrhea                   | Gastrointestinal     | 1              |                |                |                | 1            |
| Nausea                     | Gastrointestinal     | 2              |                |                |                | 2            |
| Vomiting                   | Gastrointestinal     | 2              |                |                |                | 2            |
| Chills                     | General Disorder     | 1              |                |                |                | 1            |
| Fatigue                    | General Disorder     | 2              |                |                |                | 2            |
| Fever                      | Body as a Whole      | 4              |                |                |                | 4            |
| Anorexia                   | Metabolism/Nutrition | 1              |                |                |                | 1            |
| Dizziness                  | Nervous System       | 1              |                |                |                | 1            |
| Headache                   | Nervous System       | 2              |                |                |                | 2            |
| Seizure                    | Nervous System       | 2              |                |                |                | 2            |
| Hemorrhage, post-operative | Nervous System       | 2              |                |                |                | 2            |
|                            | <b>Total</b>         | <b>20</b>      | <b>0</b>       | <b>0</b>       | <b>0</b>       | <b>20</b>    |

**Table S6. Cumulative adverse events by patient receiving G207 alone**

| Subject ID              | Event                                | System Organ Class                             | Baseline grade | CTCAE grade | Days Post-G207 | Relationship to G207 | Total |
|-------------------------|--------------------------------------|------------------------------------------------|----------------|-------------|----------------|----------------------|-------|
| 001                     | Anemia                               | Blood and lymphatic system disorders           |                | 1           | 0              | Unrelated            | 1     |
|                         | Bradycardia                          | Cardiac disorders                              |                | 1           | 1              | Unlikely             | 1     |
|                         | Diarrhea                             | Gastrointestinal disorders                     |                | 1           | 5              | Unlikely             | 2     |
|                         | Vomiting                             |                                                | 1              | 2           | 12             | Unlikely             |       |
|                         | Fever                                | General disorders                              |                | 1           | 0              | Possibly             | 1     |
|                         | Other, perirectal abscess            | Infections and Infestations                    |                | 3           | 29             | Unrelated            | 1     |
|                         | Postoperative hemorrhage             | Injury, poisoning and procedural complications |                | 1           | 3              | Possibly             | 2     |
|                         | Other, pseudomeningocele             |                                                | 3              | 84          | Unrelated      |                      |       |
|                         | Alanine aminotransferase increased   | Investigations                                 | 1              | 3           | 12             | Unlikely             | 5     |
|                         | Aspartate aminotransferase increased |                                                | 1              | 2           | 12             | Unlikely             |       |
|                         | Neutrophil count decreased           |                                                | 1              | 0           | Unrelated      |                      |       |
|                         | Platelet count decreased             |                                                | 1              | 0           | Unrelated      |                      |       |
|                         | White blood cell decreased           |                                                | 1              | 2           | 0              | Unrelated            |       |
|                         | Facial nerve disorder                | Nervous system disorders                       |                | 1           | 12             | Unlikely             | 8     |
|                         | Facial nerve disorder                |                                                | 1              | 84          | Unrelated      |                      |       |
|                         | Headache                             |                                                | 1              | 2           | 12             | Unlikely             |       |
|                         | Headache                             |                                                | 1              | 2           | 53             | Unlikely             |       |
|                         | Lethargy                             |                                                | 2              | 53          | Unlikely       |                      |       |
|                         | Other, peritumoral vasogenic edema   |                                                | 2              | 12          | Unlikely       |                      |       |
|                         | Other, peritumoral vasogenic edema   |                                                | 3              | 53          | Unlikely       |                      |       |
| Other, possible seizure | 1                                    |                                                | 84             | Unrelated   |                |                      |       |
| 002                     | Skin infection                       | Infections and Infestations                    |                | 3           | 163            | Unrelated            | 1     |
|                         | Obesity                              | Metabolism and nutrition disorders             | 2              | 3           | 14             | Unrelated            | 1     |
|                         | Skin disorder                        | Skin and subcutaneous tissue disorders         |                | 1           | 561            | Unrelated            | 1     |
| 003                     | Anemia                               | Blood and lymphatic system disorders           | 2              | 3           | 0              | Unrelated            | 1     |
|                         | Bradycardia                          | Cardiac disorders                              |                | 2           | 111            | Unrelated            | 1     |
|                         | Blurred vision                       | Eye disorders                                  |                | 1           | 49             | Unrelated            | 2     |
|                         | Eye pain                             |                                                | 1              | -1          | Unrelated      |                      |       |
|                         | Constipation                         | Gastrointestinal disorders                     |                | 1           | 140            | Unrelated            | 5     |
|                         | Diarrhea                             |                                                | 1              | 12          | Unlikely       |                      |       |
|                         | Diarrhea                             |                                                | 1              | 23          | Unrelated      |                      |       |
|                         | Vomiting                             |                                                | 2              | 11          | Unlikely       |                      |       |
|                         | Vomiting                             |                                                | 2              | 23          | Unlikely       |                      |       |
|                         | Fatigue                              | General disorders                              |                | 1           | 11             | Unlikely             | 1     |
|                         | Postoperative hemorrhage             | Injury, poisoning and procedural complications |                | 1           | 3              | Possibly             | 1     |
|                         | Alanine aminotransferase increased   | Investigations                                 | 1              | 2           | 28             | Unrelated            | 7     |

|           |                                                 |                                                |                                                 |     |           |           |   |           |
|-----------|-------------------------------------------------|------------------------------------------------|-------------------------------------------------|-----|-----------|-----------|---|-----------|
|           | Aspartate aminotransferase increased            |                                                | 1                                               | 2   | 2         | Unrelated |   |           |
|           | Lymphocyte count decreased                      |                                                | 2                                               | 3   | 28        | Unlikely  |   |           |
|           | Neutrophil count decreased                      |                                                | 1                                               | 2   | 7         | Unlikely  |   |           |
|           | Neutrophil count decreased                      |                                                | 1                                               | 3   | 14        | Unlikely  |   |           |
|           | Platelet count decreased                        |                                                | 1                                               | 1   | 28        | Unlikely  |   |           |
|           | White blood cell decreased                      |                                                | 2                                               | 3   | 14        | Unlikely  |   |           |
|           | Anorexia                                        | Metabolism and nutrition disorders             |                                                 | 1   | 11        | Unlikely  |   | 1         |
|           | Cognitive disturbance                           | Nervous system disorders                       |                                                 | 2   | 91        | Unlikely  |   | 3         |
|           | Depressed level of consciousness                |                                                |                                                 | 4   | 111       | Unlikely  |   |           |
|           | Headache                                        |                                                | 1                                               | 2   | 48        | Unlikely  |   |           |
| Cough     | Respiratory, thoracic and mediastinal disorders |                                                | 1                                               | 140 | Unrelated | 1         |   |           |
| 004       | Nausea                                          | Gastrointestinal disorders                     |                                                 | 2   | 33        | Unrelated | 3 |           |
|           | Vomiting                                        |                                                |                                                 | 1   | 1         | Unrelated |   |           |
|           | Vomiting                                        |                                                |                                                 | 1   | 33        | Unrelated |   |           |
|           | Fever                                           | General disorders                              |                                                 | 1   | 1         | Possibly  | 1 |           |
|           | Postoperative hemorrhage                        | Injury, poisoning and procedural complications |                                                 | 1   | 0         | Unrelated | 1 |           |
|           | Headache                                        | Nervous system disorders                       | 1                                               | 2   | 33        | Unrelated | 2 |           |
|           | Lethargy                                        |                                                |                                                 | 1   | 35        | Unrelated |   |           |
| 005       | Hypertension                                    | Cardiac disorders                              | 1                                               | 2   | 141       | Unrelated | 2 |           |
|           | Hypertension                                    |                                                | 1                                               | 3   | 253       | Unrelated |   |           |
|           | Cushingoid                                      | Endocrine disorders                            |                                                 | 1   | 99        | Unrelated | 1 |           |
|           | Abdominal pain                                  | Gastrointestinal disorders                     |                                                 | 1   | 30        | Unrelated | 2 |           |
|           | Nausea                                          |                                                |                                                 | 1   | 1         | Possibly  |   |           |
|           | Fever                                           | General disorders                              |                                                 | 1   | 8         | Possibly  | 1 |           |
|           | Postoperative hemorrhage                        | Injury, poisoning and procedural complications |                                                 | 1   | 0         | Unrelated | 1 |           |
|           | Other, vitamin D deficiency                     | Investigations                                 |                                                 | 2   | 226       | Unrelated | 2 |           |
|           | Weight gain                                     |                                                |                                                 | 1   | 99        | Unrelated |   |           |
|           | Anorexia                                        |                                                |                                                 | 1   | 7         | Possibly  |   |           |
|           | Hyperglycemia                                   | Metabolism and nutrition disorders             |                                                 | 2   | 143       | Unrelated | 7 |           |
|           | Hyperglycemia                                   |                                                |                                                 | 2   | 253       | Unrelated |   |           |
|           | Hypoalbuminemia                                 |                                                |                                                 | 1   | 140       | Unrelated |   |           |
|           | Hypomagnesemia                                  |                                                |                                                 | 1   | 140       | Unrelated |   |           |
|           | Hypophosphatemia                                |                                                |                                                 | 1   | 140       | Unrelated |   |           |
|           | Obesity                                         |                                                |                                                 | 3   | 98        | Unrelated |   |           |
|           | Muscle weakness right-sided                     |                                                | Musculoskeletal and connective tissue disorders | 2   | 3         | 99        |   | Unrelated |
|           | Cerebrospinal fluid Leak                        | Nervous system disorders                       |                                                 | 2   | 8         | Unrelated | 5 |           |
| Dizziness |                                                 |                                                | 1                                               | 1   | Possibly  |           |   |           |
| Dysphasia |                                                 |                                                | 1                                               | 2   | 354       | Unrelated |   |           |
| Headache  |                                                 |                                                | 1                                               | 2   | 253       | Unrelated |   |           |

|              |                                    |                                                 |  |   |     |           |           |
|--------------|------------------------------------|-------------------------------------------------|--|---|-----|-----------|-----------|
|              | <b>Seizure</b>                     |                                                 |  | 1 | 139 | Unrelated |           |
|              | <b>Depression</b>                  | Psychiatric disorders                           |  | 1 | 99  | Unrelated | 1         |
|              | <b>Sore throat</b>                 | Respiratory, thoracic and mediastinal disorders |  | 1 | 34  | Unrelated | 3         |
|              | <b>Upper respiratory infection</b> |                                                 |  | 1 | 141 | Unrelated |           |
|              | <b>Upper respiratory infection</b> |                                                 |  | 2 | 258 | Unrelated |           |
| 006          | <b>Other, chalazion</b>            | Eye disorders                                   |  | 1 | 162 | Unrelated | 1         |
|              | <b>Constipation</b>                | Gastrointestinal disorders                      |  | 1 | 1   | Unlikely  | 6         |
|              | <b>Diarrhea</b>                    |                                                 |  | 1 | 72  | Unlikely  |           |
|              | <b>Nausea</b>                      |                                                 |  | 1 | 86  | Unrelated |           |
|              | <b>Nausea</b>                      |                                                 |  | 1 | 177 | Unrelated |           |
|              | <b>Vomiting</b>                    |                                                 |  | 1 | 1   | Possibly  |           |
|              | <b>Vomiting</b>                    |                                                 |  | 1 | 87  | Unrelated |           |
|              | <b>Fatigue</b>                     | General disorders                               |  | 1 | 0   | Possibly  | 1         |
|              | <b>Headache</b>                    | Nervous system disorders                        |  | 1 | 12  | Possibly  | 3         |
|              | <b>Headache</b>                    |                                                 |  | 1 | 21  | Possibly  |           |
|              | <b>Paresthesia</b>                 |                                                 |  | 1 | 148 | Unlikely  |           |
| <b>Total</b> |                                    |                                                 |  |   |     |           | <b>91</b> |

**Table S7. Cumulative adverse events by patient receiving G207 + 5 Gy radiation**

| Subject ID   | Event                              | System Organ Class                              | Baseline grade | CTCAE grade | Days Post-G207 | Relationship to G207 | Total     |
|--------------|------------------------------------|-------------------------------------------------|----------------|-------------|----------------|----------------------|-----------|
| 007          | Other, peripheral vision loss      | Eye disorders                                   |                | 1           | 82             | Unlikely             | 2         |
|              | Blurred Vision                     |                                                 |                | 1           | 82             | Unlikely             |           |
|              | Nausea                             | Gastrointestinal disorders                      |                | 1           | 5              | Possibly             | 3         |
|              | Vomiting                           |                                                 |                | 1           | 5              | Possibly             |           |
|              | Diarrhea                           |                                                 |                | 1           | 49             | Unlikely             |           |
|              | Dysphasia                          | Nervous System disorders                        |                | 1           | 72             | Unlikely             | 3         |
|              | Headache                           |                                                 | 1              | 2           | 91             | Unlikely             |           |
| Paresthesia  | 1                                  |                                                 | 1              | 63          | Unlikely       |                      |           |
| 008          | Fever                              | General disorders                               |                | 1           | 2              | Possibly             | 1         |
| 009          | Otitis media                       | Infections and Infestations                     | 1              | 1           | 100            | Unrelated            | 1         |
|              | Postoperative hemorrhage           | Injury, poisoning and procedural complications  |                | 1           | 3              | Unlikely             | 1         |
|              | Seizure                            | Nervous system disorders                        | 1              | 1           | 4              | Possibly             | 1         |
|              | Upper respiratory infection        | Respiratory, thoracic and mediastinal disorders |                | 1           | 111            | Unrelated            | 1         |
|              | Skin Disorder                      | Skin and subcutaneous tissue disorders          |                | 1           | 14             | Unlikely             | 1         |
| 010          | External ear inflammation          | Ear and labyrinth disorders                     |                | 2           | 1              | Unlikely             | 1         |
|              | Postoperative hemorrhage           | Injury, poisoning and procedural complications  |                | 1           | 3              | Unlikely             | 1         |
|              | Platelet count decreased           | Investigations                                  |                | 1           | 14             | Unlikely             | 1         |
|              | Seizure                            | Nervous system disorders                        |                | 1           | 17             | Possibly             | 1         |
|              | Other, contact dermatitis          | Skin and subcutaneous tissue disorders          |                | 2           | 1              | Unlikely             | 1         |
| 011          | Fatigue                            | General disorders                               |                | 1           | 28             | Possibly             | 1         |
| 012          | Bradycardia                        | Cardiac disorders                               |                | 1           | 0              | Unlikely             | 5         |
|              | Bradycardia                        |                                                 |                | 1           | 29             | Unlikely             |           |
|              | Tachycardia                        |                                                 |                | 1           | -1             | Unrelated            |           |
|              | Hypertension                       |                                                 |                | 1           | -1             | Unrelated            |           |
|              | Hypotension                        |                                                 |                | 1           | 3              | Unlikely             |           |
|              | Diarrhea                           | Gastrointestinal disorders                      |                | 1           | 4              | Possibly             | 1         |
|              | Chills                             | General disorders                               |                | 1           | 5              | Possibly             | 1         |
|              | Alanine aminotransferase increased | Investigations                                  |                | 1           | -2             | Unrelated            | 5         |
|              | Hemoglobin increased               |                                                 |                | 1           | -2             | Unrelated            |           |
|              | Lymphocyte count decreased         |                                                 |                | 1           | -1             | Unrelated            |           |
|              | Weight loss                        |                                                 |                | 1           | 15             | Unlikely             |           |
|              | White blood cell decreased         |                                                 |                | 1           | -2             | Unrelated            |           |
|              | Other, hyperphosphatemia           | Metabolism and nutrition                        |                | 1           | 7              | Unlikely             | 1         |
| Headache     | Nervous system disorders           |                                                 | 1              | 0           | Unrelated      | 1                    |           |
| <b>Total</b> |                                    |                                                 |                |             |                |                      | <b>34</b> |



**Table S8. Cumulative summary of serious adverse events**

| <b>Patient ID</b> | <b>Day Post-G207</b> | <b>Duration (days)</b> | <b>SAE Description</b>                                                                                                | <b>Body System</b>                     | <b>Causality</b> | <b>Comments</b>                                                                       | <b>Outcome</b> |
|-------------------|----------------------|------------------------|-----------------------------------------------------------------------------------------------------------------------|----------------------------------------|------------------|---------------------------------------------------------------------------------------|----------------|
| 001               | 29                   | 2                      | Hospitalization for perirectal abscess                                                                                | Skin and subcutaneous tissue disorders | Unrelated        | Treated with antibiotics. HSV PCR on drainage negative                                | Resolved       |
| 001               | 53                   | 3                      | Hospitalization for headache and lethargy and noted to have enlargement of lesion on MRI with edema and midline shift | Nervous system disorder                | Unlikely related | Underwent removal of lesion and pathology showed areas of necrosis and residual tumor | Resolved       |
| 001               | 84                   | 2                      | Hospitalization with facial paresthesia and possible seizure. Found to have pseudomeningocele                         | Nervous system disorder                | Unrelated        | Had surgery to correct pseudomeningocele from day 53 surgery                          | Resolved       |
| 002               | 163                  | 9                      | Hospitalization for herpes zoster of right leg and foot                                                               | Skin and subcutaneous tissue disorders | Unrelated        | HSV-1 and HSV-2 PCR negative; varicella PCR +                                         | Resolved       |
| 003               | 111                  | 4                      | Hospitalized for altered mental status, vomiting, bradycardia, probable seizure                                       | Nervous system disorder                | Unlikely related | Symptoms improved with steroids, anti-epileptics                                      | Resolved       |
| 005               | 8                    | 4                      | Hospitalized for a single fever to 101°F and cerebrospinal fluid leak (CSF)                                           | Nervous system disorder                | Unrelated        | Stitch oversewn; CSF culture negative. CSF HSV PCR 5480 copies. No additional leak    | Resolved       |
| 005               | 139                  | 5                      | Hospitalized for new onset seizures                                                                                   | Nervous system disorder                | Unrelated        | Clinically improved with anti-epileptics                                              | Resolved       |

**Table S9: Difference in median positive cells in six high-powered field regions of interest for each patient's post-treatment compared to pre-treatment tissue samples**

| <b>Subject #</b> | <b>CD3+ (95% CI)</b> | <b>CD4+ (95% CI)</b> | <b>CD8+ (95% CI)</b> | <b>CD20+ (95% CI)</b> | <b>CD138+ (95% CI)</b> |
|------------------|----------------------|----------------------|----------------------|-----------------------|------------------------|
| <b>001</b>       | 33.5 (14, 48)        | 3.5 (1, 6)           | 20.5 (9, 43)         | Not performed         | Not performed          |
| <b>006</b>       | 9 (4, 20)            | 4.5 (2, 17)          | 6 (1, 13)            | 0 (-2, 0)             | 0 (-2, 0)              |
| <b>009</b>       | 167.5 (133, 263)     | 83 (48, 123)         | 118 (65, 223)        | 20.5 (7, 137)         | 43.5 (39, 74)          |
| <b>010</b>       | 92.5 (48, 105)       | 21 (15, 37)          | 55.5 (30, 63)        | 0 (0, 1)              | 5.5 (4, 13)            |

See figure S3 for graphical representations

**Table S10. Serologic responses to single dose of intratumoral G207**

| <b>Patient</b> | <b>G207 Dose</b> | <b>HSV-1 IgG Baseline</b> | <b>HSV-1 IgG Post-G207</b> | <b>Month Serology Last Checked/<br/>Month Patient Seroconverted</b> | <b>Overall Survival</b> |
|----------------|------------------|---------------------------|----------------------------|---------------------------------------------------------------------|-------------------------|
| 001            | 10 <sup>7</sup>  | +                         | +                          | 1                                                                   | 8.7                     |
| 002            | 10 <sup>7</sup>  | -                         | -                          | 24                                                                  | 42.2; alive             |
| 003            | 10 <sup>7</sup>  | -                         | -                          | 5                                                                   | 6.7                     |
| 004            | 10 <sup>8</sup>  | -                         | -                          | 1                                                                   | 12.2                    |
| 005            | 10 <sup>8</sup>  | -                         | +                          | 3                                                                   | 18.3                    |
| 006            | 10 <sup>8</sup>  | -                         | +                          | 5                                                                   | 18.7                    |
| 007            | 10 <sup>7</sup>  | -                         | -                          | 3                                                                   | 9.2                     |
| 008            | 10 <sup>7</sup>  | +                         | +                          | 3                                                                   | 5.1                     |
| 009            | 10 <sup>7</sup>  | -                         | -                          | 5                                                                   | 19.4; alive             |
| 010            | 10 <sup>8</sup>  | -                         | +                          | 1                                                                   | 12.6                    |
| 011            | 10 <sup>8</sup>  | +                         | +                          | 1                                                                   | 3.8                     |
| 012            | 10 <sup>8</sup>  | -                         | -                          | 1                                                                   | 1.7; alive              |

+, positive; -, negative; red color signifies patients that seroconverted; blue color signifies patients that had baseline antibodies to HSV.

**Table S11. Peripheral blood counts at baseline and day 7, 14 and 28 after treatment**

| Patient | Baseline |      |      |                  |                   | Absolute Activated T Cells |       |        |        | CD4/CD8 Ratio |       |        |        | Overall Survival |
|---------|----------|------|------|------------------|-------------------|----------------------------|-------|--------|--------|---------------|-------|--------|--------|------------------|
|         | WBC      | ANC  | ALC  | Absolute T cells | Absolute NK Cells | Baseline                   | Day 7 | Day 14 | Day 28 | Baseline      | Day 7 | Day 14 | Day 28 |                  |
| 1       | 3.4      | 2240 | 750  | 416              | 29                | 82                         | 84    | 69     | 191    | 1.14          | 0.9   | 0.73   | 1.01   | 8.7              |
| 2       | 4.9      | 3080 | 1190 | 707              | 190               | 134                        | 105   | 83     | 55     | 0.37          | 0.37  | 0.4    | 0.42   | 42.2; alive      |
| 3       | 2.4      | 1560 | 600  | 495              | 20                | 98                         | 110   | 105    | 67     | 1.1           | 1.1   | 1.72   | 1.47   | 6.7              |
| 4       | 4.1      | 2140 | 1520 | 1171             | 152               | 125                        | 68    | 72     | 48     | 1.21          | 1.18  | 1.1    | 1.11   | 12.2             |
| 5       | 9.2      | 5570 | 2780 | 1508             | 250               | 139                        | 120   | 67     | 136    | 1.1           | 1.15  | 0.82   | 1.14   | 18.3             |
| 6       | 5.1      | 2730 | 1600 | 1059             | 176               | 149                        | 137   | 100    | 180    | 1.16          | 1.38  | 1.36   | 1.26   | 18.7             |
| 7       | 4.6      | 2810 | 1430 | 1143             | 43                | 90                         | 119   | 181    | 96     | 0.72          | 0.79  | 0.65   | 0.55   | 9.2              |
| 8       | 5.7      | 2130 | 3020 | 2072             | 574               | 284                        | 68    | 231    | 180    | 0.7           | 0.96  | 0.97   | 1.23   | 5.1              |
| 9       | 5.4      | 2590 | 1740 | 1200             | 191               | 17                         | 25    | 47     | 87     | 1.33          | 1.5   | 1.52   | 1.23   | 19.4; alive      |
| 10      | 2.7      | 1840 | 499  | 324              | 85                | 15                         | 50    | 66     | 31     | 0.79          | 0.52  | 0.87   | 0.93   | 12.6             |
| 11      | 4.5      | 2630 | 1440 | 1156             | 86                | 29                         | 29    | ND     | 52     | 1.36          | 1.26  | ND     | 1.2    | 3.8              |
| 12      | 4.3      | 1930 | 1750 | 1825             | ND                | ND                         | ND    | ND     | ND     | 0.99          | 1.24  | ND     | 1.03   | 1.7; alive       |

ALC, absolute lymphocyte count; ANC, absolute neutrophil count; ND, no data; NK, natural killer; WBC, white blood count

## Supplementary References

1. He B, Gross M, Roizman B. The gamma(1)34.5 protein of herpes simplex virus 1 complexes with protein phosphatase 1alpha to dephosphorylate the alpha subunit of the eukaryotic translation initiation factor 2 and preclude the shutoff of protein synthesis by double-stranded RNA-activated protein kinase. *Proceedings of the National Academy of Sciences of the United States of America* 1997;94:843-8.
2. Goldstein DJ, Weller SK. Herpes simplex virus type 1-induced ribonucleotide reductase activity is dispensable for virus growth and DNA synthesis: isolation and characterization of an ICP6 lacZ insertion mutant. *J Virol* 1988;62:196-205.
3. Hu LS, Eschbacher JM, Heiserman JE, et al. Reevaluating the imaging definition of tumor progression: perfusion MRI quantifies recurrent glioblastoma tumor fraction, pseudoprogression, and radiation necrosis to predict survival. *Neuro Oncol* 2012;14:919-30.
4. Iv M, Liu X, Lavezo J, et al. Perfusion MRI-Based Fractional Tumor Burden Differentiates between Tumor and Treatment Effect in Recurrent Glioblastomas and Informs Clinical Decision-Making. *AJNR Am J Neuroradiol* 2019;40:1649-57.
5. Hoxworth JM, Eschbacher JM, Gonzales AC, et al. Performance of Standardized Relative CBV for Quantifying Regional Histologic Tumor Burden in Recurrent High-Grade Glioma: Comparison against Normalized Relative CBV Using Image-Localized Stereotactic Biopsies. *AJNR Am J Neuroradiol* 2020;41:408-15.
